# Supplementary material for: Luminescent Properties of Phosphonate Ester-Supported Neodymium(III) Nitrate and Chloride Complexes
Source: MDPI journal article supplement (doi:10.3390/molecules28010048), 2022-12-21
Supplement: s1 [file s1]

## Supporting Information

### Luminescent properties of phosphonate ester-supported neodymium(III) nitrate and chloride complexes

Miriam Gerstel <sup>1</sup>, Ingo Koehne <sup>2</sup>, Johann Peter Reithmaier<sup>1</sup>, Rudolf Pietschnig <sup>2</sup>, and Mohamed Benyoucef <sup>1\*</sup>

<sup>1</sup>: Institute of Nanostructure Technologies and Analytics (INA) and CINSaT, University of Kassel, Heinrich-Plett-Str. 40, 34132 Kassel, Germany.

<sup>2</sup>: Institute of Chemistry and Center for Interdisciplinary Nanostructure Science and Technology (CINSaT), University of Kassel, Heinrich-Plett-Str. 40, 34132 Kassel, Germany.

\*Email: m.benyoucef@physik.uni-kassel.de

#### Contents

|     |                                                                                                       |    |
|-----|-------------------------------------------------------------------------------------------------------|----|
| 1   | NMR Spectra.....                                                                                      | 2  |
| 1.1 | Geminal Bisphosphonate Ester Complex [La(L3) <sub>2</sub> (NO <sub>3</sub> ) <sub>3</sub> ] (6) ..... | 2  |
| 2   | Crystallographic Data .....                                                                           | 3  |
| 2.1 | Complex [Nd(L3) <sub>2</sub> (NO <sub>3</sub> ) <sub>3</sub> ] (5) .....                              | 4  |
| 2.2 | Complex [La(L3) <sub>2</sub> (NO <sub>3</sub> ) <sub>3</sub> ] (6) .....                              | 8  |
| 3   | ATR IR Spectra of Complexes 5 & 6 .....                                                               | 12 |
| 4   | Absorption Spectrum of Complex 5 .....                                                                | 13 |
| 5   | References.....                                                                                       | 13 |



## 2 CRYSTALLOGRAPHIC DATA

**Table S1.** Crystallographic data for complexes **5** and **6**.

| Compound                                                                                                                                                                                                                                                   | 5                                                                                               | 6                                                                                               |
|------------------------------------------------------------------------------------------------------------------------------------------------------------------------------------------------------------------------------------------------------------|-------------------------------------------------------------------------------------------------|-------------------------------------------------------------------------------------------------|
| CCDC number                                                                                                                                                                                                                                                | 2201668                                                                                         | 2201669                                                                                         |
| formula                                                                                                                                                                                                                                                    | C <sub>46</sub> H <sub>58</sub> Br <sub>2</sub> N <sub>3</sub> NdO <sub>21</sub> P <sub>4</sub> | C <sub>46</sub> H <sub>58</sub> Br <sub>2</sub> LaN <sub>3</sub> O <sub>21</sub> P <sub>4</sub> |
| MW [g mol <sup>-1</sup> ]                                                                                                                                                                                                                                  | 1416.89                                                                                         | 1411.56                                                                                         |
| T [K]                                                                                                                                                                                                                                                      | 100(2)                                                                                          | 100(2)                                                                                          |
| space group                                                                                                                                                                                                                                                | C2/c                                                                                            | C2/c                                                                                            |
| a [Å]                                                                                                                                                                                                                                                      | 33.0143(18)                                                                                     | 33.096(2)                                                                                       |
| b [Å]                                                                                                                                                                                                                                                      | 8.7779(3)                                                                                       | 8.8402(4)                                                                                       |
| c [Å]                                                                                                                                                                                                                                                      | 19.2500(12)                                                                                     | 19.2891(12)                                                                                     |
| α [°]                                                                                                                                                                                                                                                      | 90                                                                                              | 90                                                                                              |
| β [°]                                                                                                                                                                                                                                                      | 99.176(5)                                                                                       | 98.866(5)                                                                                       |
| γ [°]                                                                                                                                                                                                                                                      | 90                                                                                              | 90                                                                                              |
| V [Å <sup>3</sup> ]                                                                                                                                                                                                                                        | 5507.2(5)                                                                                       | 5576.0(6)                                                                                       |
| Z                                                                                                                                                                                                                                                          | 4                                                                                               | 4                                                                                               |
| μ [mm <sup>-1</sup> ]                                                                                                                                                                                                                                      | 2.589                                                                                           | 9.361                                                                                           |
| θ <sub>max</sub> [°]                                                                                                                                                                                                                                       | 25.776                                                                                          | 71.133                                                                                          |
| reflections measured                                                                                                                                                                                                                                       | 12710                                                                                           | 10096                                                                                           |
| reflections unique                                                                                                                                                                                                                                         | 5232                                                                                            | 5049                                                                                            |
| R <sub>int</sub>                                                                                                                                                                                                                                           | 0.049                                                                                           | 0.036                                                                                           |
| data/restr./para.                                                                                                                                                                                                                                          | 5232/140/522                                                                                    | 3808/0/229                                                                                      |
| R <sub>1</sub> [ I >2σ(I)] <sup>[a]</sup>                                                                                                                                                                                                                  | 0.0640                                                                                          | 0.0629                                                                                          |
| wR <sub>2</sub> (all) <sup>[b]</sup>                                                                                                                                                                                                                       | 0.1833                                                                                          | 0.1614                                                                                          |
| Abs. struct. param. <sup>1</sup>                                                                                                                                                                                                                           | 0.00082(15)                                                                                     | --                                                                                              |
| Δρ <sub>fin</sub> [eÅ <sup>-3</sup> ]                                                                                                                                                                                                                      | 1.04/−1.45                                                                                      | 1.04/−1.27                                                                                      |
| [a] R <sub>1</sub> = (Σ F <sub>o</sub>   −  F <sub>c</sub>  )/(Σ F <sub>o</sub>  ); [b] wR <sub>2</sub> = [{Σw(F <sub>o</sub> <sup>2</sup> − F <sub>c</sub> <sup>2</sup> ) <sup>2</sup> }/Σw(F <sub>o</sub> <sup>2</sup> ) <sup>2</sup> ] <sup>1/2</sup> . |                                                                                                 |                                                                                                 |

## 2.1 Complex [Nd(L3)<sub>2</sub>(NO<sub>3</sub>)<sub>3</sub>] (5)

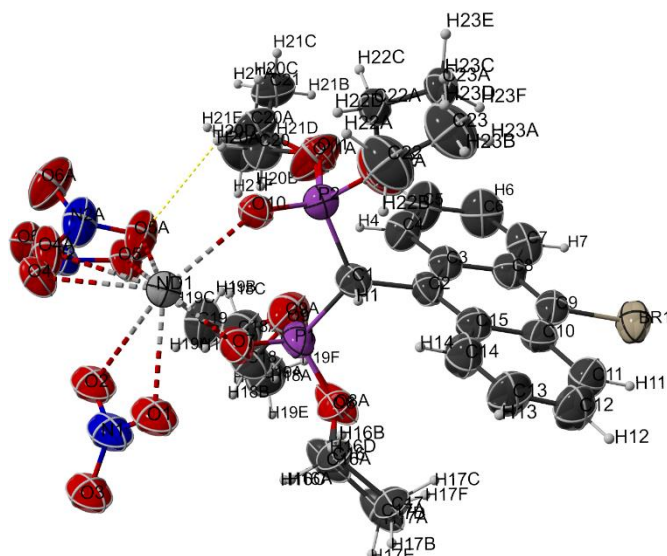

**Figure S3.** Asymmetric unit of **5**.

**5** crystallizes in the monoclinic space group *C2/c* containing half a molecule in the asymmetric unit. The other half is generated by a two-fold rotational axis (Symmetry code: #1:  $-x+1, y, -z+3/2$ ). The Nd ion as well as one of the nitrate anions reside on a special position on a *C<sub>2</sub>* symmetry element and hence are only occupied by ½. The latter also shows a special position disorder about two positions. The other nitrate anion and the four ethoxy groups are disordered about two positions as well. They are refined with distance restraints and restraints for the anisotropic displacement parameters. The minor positions refined to 0.499(15), 0.436(18) and 0.497(12), respectively.

Bond lengths [Å] and angles [°] of **5**.

|               |           |               |           |
|---------------|-----------|---------------|-----------|
| O(1)–N(1)     | 1.262(13) | Nd(1)–O(5)#1  | 2.522(10) |
| O(1)–Nd(1)    | 2.479(11) | Nd(1)–O(5A)#1 | 2.606(11) |
| O(2)–N(1)     | 1.272(13) | Nd(1)–O(5A)   | 2.607(11) |
| O(2)–Nd(1)    | 2.570(10) | Nd(1)–O(4)#1  | 2.627(11) |
| N(1)–O(3)     | 1.241(12) | Nd(1)–O(4)    | 2.627(11) |
| Br(1)–C(9)    | 1.896(7)  | O(4)–N(2)     | 1.270(15) |
| C(1)–C(2)     | 1.580(9)  | O(5)–N(2)     | 1.277(13) |
| C(1)–P(2)     | 1.772(7)  | N(2)–O(6)     | 1.219(11) |
| C(1)–P(1)     | 1.786(6)  | O(4A)–N(2A)   | 1.258(15) |
| Nd(1)–O(10)   | 2.412(4)  | O(5A)–N(2A)   | 1.266(13) |
| Nd(1)–O(10)#1 | 2.413(4)  | N(2A)–O(6A)   | 1.276(13) |
| Nd(1)–O(7)#1  | 2.473(5)  | P(1)–O(7)     | 1.468(5)  |
| Nd(1)–O(7)    | 2.473(5)  | P(1)–O(8)     | 1.543(8)  |
| Nd(1)–O(5)    | 2.522(10) | P(1)–O(9)     | 1.551(9)  |

|               |           |                      |            |
|---------------|-----------|----------------------|------------|
| P(1)–O(8A)    | 1.555(14) |                      |            |
| P(1)–O(9A)    | 1.560(15) | N(1)–O(1)–Nd(1)      | 98.5(8)    |
| O(8)–C(16)    | 1.432(14) | N(1)–O(2)–Nd(1)      | 93.9(8)    |
| C(16)–C(17)   | 1.541(13) | O(3)–N(1)–O(1)       | 120.4(11)  |
| O(9)–C(18)    | 1.456(14) | O(3)–N(1)–O(2)       | 122.6(12)  |
| C(18)–C(19)   | 1.448(19) | O(1)–N(1)–O(2)       | 116.9(10)  |
| O(8A)–C(16A)  | 1.438(16) | O(3)–N(1)–Nd(1)      | 176.8(10)  |
| C(16A)–C(17A) | 1.523(17) | O(1)–N(1)–Nd(1)      | 56.4(6)    |
| O(9A)–C(18A)  | 1.446(18) | O(2)–N(1)–Nd(1)      | 60.6(7)    |
| C(18A)–C(19A) | 1.47(2)   | C(2)–C(1)–P(2)       | 121.7(4)   |
| P(2)–O(10)    | 1.463(5)  | C(2)–C(1)–P(1)       | 115.9(4)   |
| P(2)–O(11A)   | 1.549(12) | P(2)–C(1)–P(1)       | 118.4(4)   |
| P(2)–O(11)    | 1.558(9)  | O(10)–Nd(1)–O(10)#1  | 71.2(2)    |
| P(2)–O(12)    | 1.564(13) | O(10)–Nd(1)–O(7)#1   | 136.05(17) |
| P(2)–O(12A)   | 1.564(8)  | O(10)#1–Nd(1)–O(7)#1 | 72.51(16)  |
| O(11)–C(20)   | 1.467(15) | O(10)–Nd(1)–O(7)     | 72.51(16)  |
| C(20)–C(21)   | 1.502(19) | O(10)#1–Nd(1)–O(7)   | 136.05(17) |
| O(12)–C(22)   | 1.405(19) | O(7)#1–Nd(1)–O(7)    | 150.1(2)   |
| C(22)–C(23)   | 1.383(17) | O(10)–Nd(1)–O(1)     | 135.9(3)   |
| O(11A)–C(20A) | 1.467(16) | O(10)#1–Nd(1)–O(1)   | 147.2(3)   |
| C(20A)–C(21A) | 1.494(19) | O(7)#1–Nd(1)–O(1)    | 74.7(3)    |
| O(12A)–C(22A) | 1.432(16) | O(7)–Nd(1)–O(1)      | 76.6(3)    |
| C(22A)–C(23A) | 1.426(14) | O(10)–Nd(1)–O(5)     | 82.7(3)    |
| C(2)–C(3)     | 1.387(10) | O(10)#1–Nd(1)–O(5)   | 80.6(3)    |
| C(2)–C(15)    | 1.405(9)  | O(7)#1–Nd(1)–O(5)    | 114.8(3)   |
| C(3)–C(4)     | 1.430(10) | O(7)–Nd(1)–O(5)      | 70.9(3)    |
| C(3)–C(8)     | 1.450(9)  | O(1)–Nd(1)–O(5)      | 115.8(4)   |
| C(4)–C(5)     | 1.359(12) | O(10)–Nd(1)–O(5)#1   | 80.6(3)    |
| C(5)–C(6)     | 1.392(13) | O(10)#1–Nd(1)–O(5)#1 | 82.7(3)    |
| C(6)–C(7)     | 1.359(12) | O(7)#1–Nd(1)–O(5)#1  | 70.9(3)    |
| C(7)–C(8)     | 1.420(11) | O(7)–Nd(1)–O(5)#1    | 114.8(3)   |
| C(8)–C(9)     | 1.374(10) | O(1)–Nd(1)–O(5)#1    | 84.8(4)    |
| C(9)–C(10)    | 1.388(11) | O(5)–Nd(1)–O(5)#1    | 159.3(6)   |
| C(10)–C(15)   | 1.437(10) | O(10)–Nd(1)–O(2)     | 139.7(3)   |
| C(10)–C(11)   | 1.444(10) | O(10)#1–Nd(1)–O(2)   | 125.7(3)   |
| C(11)–C(12)   | 1.340(12) | O(7)#1–Nd(1)–O(2)    | 82.6(3)    |
| C(12)–C(13)   | 1.397(13) | O(7)–Nd(1)–O(2)      | 72.6(3)    |
| C(13)–C(14)   | 1.271(10) | O(1)–Nd(1)–O(2)      | 50.6(4)    |
| C(14)–C(15)   | 1.505(10) | O(5)–Nd(1)–O(2)      | 67.2(4)    |

|                       |           |                     |           |
|-----------------------|-----------|---------------------|-----------|
| O(5)#1–Nd(1)–O(2)     | 133.1(4)  | N(2A)–O(4A)–Nd(1)   | 95.6(7)   |
| O(10)–Nd(1)–O(5A)#1   | 72.1(3)   | N(2A)–O(5A)–Nd(1)   | 100.2(9)  |
| O(10)#1–Nd(1)–O(5A)#1 | 70.3(4)   | O(4A)–N(2A)–O(5A)   | 114.6(12) |
| O(7)#1–Nd(1)–O(5A)#1  | 72.9(3)   | O(4A)–N(2A)–O(6A)   | 121.6(12) |
| O(7)–Nd(1)–O(5A)#1    | 119.9(3)  | O(5A)–N(2A)–O(6A)   | 123.8(15) |
| O(1)–Nd(1)–O(5A)#1    | 98.1(5)   | O(7)–P(1)–O(8)      | 111.5(7)  |
| O(5)–Nd(1)–O(5A)#1    | 146.1(6)  | O(7)–P(1)–O(9)      | 116.1(8)  |
| O(5)#1–Nd(1)–O(5A)#1  | 13.4(3)   | O(8)–P(1)–O(9)      | 104.0(10) |
| O(2)–Nd(1)–O(5A)#1    | 145.0(4)  | O(7)–P(1)–O(8A)     | 117.1(9)  |
| O(10)–Nd(1)–O(5A)     | 70.3(4)   | O(7)–P(1)–O(9A)     | 114.3(14) |
| O(10)#1–Nd(1)–O(5A)   | 72.1(3)   | O(8A)–P(1)–O(9A)    | 102.5(13) |
| O(7)#1–Nd(1)–O(5A)    | 119.9(3)  | O(7)–P(1)–C(1)      | 111.2(3)  |
| O(7)–Nd(1)–O(5A)      | 72.9(3)   | O(8)–P(1)–C(1)      | 107.7(10) |
| O(5A)#1–Nd(1)–O(5A)   | 133.3(8)  | O(9)–P(1)–C(1)      | 105.8(6)  |
| O(10)–Nd(1)–O(4)#1    | 71.5(3)   | O(8A)–P(1)–C(1)     | 108.3(13) |
| O(10)#1–Nd(1)–O(4)#1  | 123.8(3)  | O(9A)–P(1)–C(1)     | 102.2(9)  |
| O(7)#1–Nd(1)–O(4)#1   | 111.0(4)  | C(16)–O(8)–P(1)     | 122.8(11) |
| O(7)–Nd(1)–O(4)#1     | 64.3(3)   | O(8)–C(16)–C(17)    | 106.7(11) |
| O(1)–Nd(1)–O(4)#1     | 67.1(4)   | C(18)–O(9)–P(1)     | 114.9(11) |
| O(5)–Nd(1)–O(4)#1     | 133.0(4)  | C(19)–C(18)–O(9)    | 106.4(15) |
| O(5)#1–Nd(1)–O(4)#1   | 51.0(3)   | C(16A)–O(8A)–P(1)   | 119.3(14) |
| O(2)–Nd(1)–O(4)#1     | 109.9(4)  | O(8A)–C(16A)–C(17A) | 108.6(14) |
| O(10)–Nd(1)–O(4)      | 123.8(3)  | C(18A)–O(9A)–P(1)   | 128(2)    |
| O(10)#1–Nd(1)–O(4)    | 71.5(3)   | O(9A)–C(18A)–C(19A) | 112(2)    |
| O(7)#1–Nd(1)–O(4)     | 64.3(3)   | O(10)–P(2)–O(11A)   | 113.3(9)  |
| O(7)–Nd(1)–O(4)       | 111.0(4)  | O(10)–P(2)–O(11)    | 115.7(7)  |
| O(1)–Nd(1)–O(4)       | 96.2(4)   | O(10)–P(2)–O(12)    | 117.6(9)  |
| O(5)–Nd(1)–O(4)       | 51.0(3)   | O(11)–P(2)–O(12)    | 98.5(11)  |
| O(5)#1–Nd(1)–O(4)     | 133.0(4)  | O(10)–P(2)–O(12A)   | 114.5(6)  |
| O(2)–Nd(1)–O(4)       | 54.3(4)   | O(11A)–P(2)–O(12A)  | 106.0(10) |
| O(4)#1–Nd(1)–O(4)     | 163.1(6)  | O(10)–P(2)–C(1)     | 109.2(3)  |
| N(2)–O(4)–Nd(1)       | 91.5(7)   | O(11A)–P(2)–C(1)    | 110.7(12) |
| N(2)–O(5)–Nd(1)       | 96.2(7)   | O(11)–P(2)–C(1)     | 112.7(9)  |
| O(6)–N(2)–O(4)        | 120.6(11) | O(12)–P(2)–C(1)     | 102.1(12) |
| O(6)–N(2)–O(5)        | 118.4(12) | O(12A)–P(2)–C(1)    | 102.6(7)  |
| O(4)–N(2)–O(5)        | 121.0(10) | C(20)–O(11)–P(2)    | 120.3(11) |
| O(6)–N(2)–Nd(1)       | 173.8(10) | O(11)–C(20)–C(21)   | 103.8(14) |
| O(4)–N(2)–Nd(1)       | 63.0(6)   | C(22)–O(12)–P(2)    | 125.2(18) |
| O(5)–N(2)–Nd(1)       | 58.2(6)   | C(23)–C(22)–O(12)   | 117.1(16) |

|                      |           |                   |          |
|----------------------|-----------|-------------------|----------|
| C(20A)–O(11A)–P(2)   | 123.3(16) | C(9)–C(8)–C(3)    | 117.7(7) |
| O(11A)–C(20A)–C(21A) | 108.5(17) | C(7)–C(8)–C(3)    | 118.9(6) |
| C(22A)–O(12A)–P(2)   | 124.8(11) | C(8)–C(9)–C(10)   | 123.5(6) |
| C(23A)–C(22A)–O(12A) | 112.2(10) | C(8)–C(9)–Br(1)   | 118.3(6) |
| C(3)–C(2)–C(15)      | 121.1(6)  | C(10)–C(9)–Br(1)  | 118.1(5) |
| C(3)–C(2)–C(1)       | 119.0(6)  | P(2)–O(10)–Nd(1)  | 148.8(3) |
| C(15)–C(2)–C(1)      | 119.9(6)  | C(9)–C(10)–C(15)  | 118.5(6) |
| C(2)–C(3)–C(4)       | 123.1(6)  | C(9)–C(10)–C(11)  | 123.5(7) |
| C(2)–C(3)–C(8)       | 119.9(6)  | C(15)–C(10)–C(11) | 117.9(7) |
| C(4)–C(3)–C(8)       | 116.9(6)  | C(12)–C(11)–C(10) | 123.1(8) |
| C(5)–C(4)–C(3)       | 121.3(7)  | C(11)–C(12)–C(13) | 119.0(8) |
| C(4)–C(5)–C(6)       | 121.1(8)  | C(14)–C(13)–C(12) | 122.2(9) |
| C(7)–C(6)–C(5)       | 120.6(8)  | C(13)–C(14)–C(15) | 123.7(8) |
| P(1)–O(7)–Nd(1)      | 143.8(3)  | C(2)–C(15)–C(10)  | 119.0(6) |
| C(6)–C(7)–C(8)       | 121.0(8)  | C(2)–C(15)–C(14)  | 127.1(6) |
| C(9)–C(8)–C(7)       | 123.4(7)  | C(10)–C(15)–C(14) | 113.8(6) |

## 2.2 Complex [La(L3)<sub>2</sub>(NO<sub>3</sub>)<sub>3</sub>] (6)

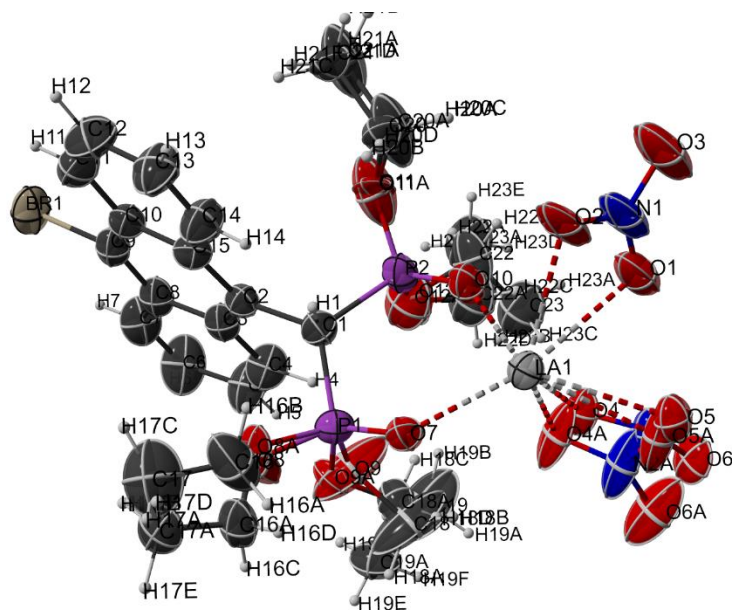

**Figure S4.** Asymmetric unit of **6**.

**6** crystallizes in the monoclinic space group *C2/c* containing half a molecule in the asymmetric unit. The other half is generated by a two-fold rotational axis (Symmetry code: #1:  $-x+1, y, -z+3/2$ ). The La ion as well as one of the nitrate anions reside on a special position on a *C*<sub>2</sub> symmetry element and hence are only occupied by ½. The latter also shows a special position disorder about two positions. The other nitrate anion and the four ethoxy groups are disordered about two positions as well. They are refined with distance restraints and restraints for the anisotropic displacement parameters. The minor positions refined to 0.477(22), 0.471(15) and 0.363(15), respectively.

Bond lengths [Å] and angles [°] of **6**.

|            |           |               |           |
|------------|-----------|---------------|-----------|
| C(1)–C(2)  | 1.555(9)  | La(1)–O(7)    | 2.466(5)  |
| C(1)–P(1)  | 1.780(7)  | La(1)–O(7)#1  | 2.466(5)  |
| C(1)–P(2)  | 1.796(7)  | La(1)–O(10)   | 2.538(5)  |
| O(1)–N(1)  | 1.283(15) | La(1)–O(10)#1 | 2.538(5)  |
| O(1)–La(1) | 2.583(17) | La(1)–O(4)    | 2.609(10) |
| O(2)–N(1)  | 1.284(17) | La(1)–O(4)#1  | 2.609(10) |
| O(2)–La(1) | 2.582(18) | La(1)–O(4A)   | 2.658(13) |
| N(1)–O(3)  | 1.217(13) | La(1)–O(4A)#1 | 2.658(13) |
| C(3)–C(2)  | 1.418(10) | La(1)–O(5)    | 2.667(12) |
| C(3)–C(4)  | 1.426(10) | La(1)–O(5)#1  | 2.667(12) |
| C(3)–C(8)  | 1.433(9)  | O(4)–N(2)     | 1.273(13) |
| C(2)–C(15) | 1.412(9)  | O(5)–N(2)     | 1.274(15) |



|               |           |                      |            |
|---------------|-----------|----------------------|------------|
| N(2)–O(6)     | 1.211(12) | C(11)–C(12)          | 1.341(13)  |
| O(4A)–N(2A)   | 1.263(14) | C(12)–C(13)          | 1.402(14)  |
| O(5A)–N(2A)   | 1.276(18) | C(13)–C(14)          | 1.269(11)  |
| N(2A)–O(6A)   | 1.244(15) | C(14)–C(15)          | 1.510(10)  |
| C(4)–C(5)     | 1.350(11) |                      |            |
| C(5)–C(6)     | 1.414(13) | C(2)–C(1)–P(1)       | 121.4(5)   |
| P(1)–O(7)     | 1.466(5)  | C(2)–C(1)–P(2)       | 116.0(5)   |
| P(1)–O(8)     | 1.539(13) | P(1)–C(1)–P(2)       | 117.8(4)   |
| P(1)–O(9A)    | 1.540(9)  | N(1)–O(1)–La(1)      | 96.1(11)   |
| P(1)–O(9)     | 1.541(13) | N(1)–O(2)–La(1)      | 96.1(11)   |
| P(1)–O(8A)    | 1.567(8)  | O(3)–N(1)–O(1)       | 122.4(16)  |
| O(8)–C(16)    | 1.49(2)   | O(3)–N(1)–O(2)       | 120.1(14)  |
| C(16)–C(17)   | 1.34(2)   | O(1)–N(1)–O(2)       | 117.4(11)  |
| O(9)–C(18)    | 1.450(18) | O(3)–N(1)–La(1)      | 178.8(15)  |
| C(18)–C(19)   | 1.47(2)   | O(1)–N(1)–La(1)      | 58.8(9)    |
| O(8A)–C(16A)  | 1.463(18) | O(2)–N(1)–La(1)      | 58.7(9)    |
| C(16A)–C(17A) | 1.375(17) | C(2)–C(3)–C(4)       | 122.6(6)   |
| O(9A)–C(18A)  | 1.443(14) | C(2)–C(3)–C(8)       | 120.2(6)   |
| C(18A)–C(19A) | 1.44(2)   | C(4)–C(3)–C(8)       | 117.1(6)   |
| C(6)–C(7)     | 1.352(13) | C(15)–C(2)–C(3)      | 119.3(6)   |
| C(7)–C(8)     | 1.440(11) | C(15)–C(2)–C(1)      | 120.8(6)   |
| P(2)–O(10)    | 1.467(5)  | C(3)–C(2)–C(1)       | 119.9(6)   |
| P(2)–O(11A)   | 1.551(17) | O(7)–La(1)–O(7)#1    | 71.7(2)    |
| P(2)–O(12)    | 1.554(8)  | O(7)–La(1)–O(10)     | 71.43(16)  |
| P(2)–O(12A)   | 1.559(16) | O(7)#1–La(1)–O(10)   | 135.24(17) |
| P(2)–O(11)    | 1.561(7)  | O(7)–La(1)–O(10)#1   | 135.24(17) |
| O(11)–C(20)   | 1.410(14) | O(7)#1–La(1)–O(10)#1 | 71.43(15)  |
| C(20)–C(21)   | 1.549(14) | O(10)–La(1)–O(10)#1  | 152.0(2)   |
| O(12)–C(22)   | 1.462(14) | O(7)–La(1)–O(2)      | 135.3(4)   |
| C(22)–C(23)   | 1.40(2)   | O(7)#1–La(1)–O(2)    | 146.3(4)   |
| O(11A)–C(20A) | 1.404(19) | O(10)–La(1)–O(2)     | 78.4(4)    |
| C(20A)–C(21A) | 1.55(2)   | O(10)#1–La(1)–O(2)   | 75.0(4)    |
| O(12A)–C(22A) | 1.44(2)   | O(7)–La(1)–O(1)      | 140.3(4)   |
| C(22A)–C(23A) | 1.42(3)   | O(7)#1–La(1)–O(1)    | 126.8(4)   |
| C(8)–C(9)     | 1.391(11) | O(10)–La(1)–O(1)     | 73.2(4)    |
| C(9)–C(10)    | 1.389(11) | O(10)#1–La(1)–O(1)   | 83.2(4)    |
| C(9)–Br(1)    | 1.903(7)  | O(2)–La(1)–O(1)      | 50.3(4)    |
| C(10)–C(15)   | 1.425(9)  | O(7)–La(1)–O(4)      | 83.2(3)    |
| C(10)–C(11)   | 1.429(11) | O(7)#1–La(1)–O(4)    | 79.2(3)    |

|                       |          |                     |           |
|-----------------------|----------|---------------------|-----------|
| O(10)–La(1)–O(4)      | 72.1(3)  | O(5)–La(1)–O(5)#1   | 165.6(7)  |
| O(10)#1–La(1)–O(4)    | 113.5(3) | N(2)–O(4)–La(1)     | 97.6(7)   |
| O(2)–La(1)–O(4)       | 118.0(4) | N(2)–O(5)–La(1)     | 94.8(7)   |
| O(1)–La(1)–O(4)       | 69.2(4)  | O(6)–N(2)–O(4)      | 119.7(12) |
| O(7)–La(1)–O(4)#1     | 79.2(3)  | O(6)–N(2)–O(5)      | 122.1(12) |
| O(7)#1–La(1)–O(4)#1   | 83.2(3)  | O(4)–N(2)–O(5)      | 118.3(10) |
| O(10)–La(1)–O(4)#1    | 113.5(3) | O(6)–N(2)–La(1)     | 173.8(11) |
| O(10)#1–La(1)–O(4)#1  | 72.1(3)  | O(4)–N(2)–La(1)     | 58.0(6)   |
| O(2)–La(1)–O(4)#1     | 83.7(4)  | O(5)–N(2)–La(1)     | 60.6(6)   |
| O(1)–La(1)–O(4)#1     | 132.3(5) | N(2A)–O(4A)–La(1)   | 99.0(9)   |
| O(4)–La(1)–O(4)#1     | 158.3(6) | N(2A)–O(5A)–La(1)   | 96.5(8)   |
| O(7)–La(1)–O(4A)      | 71.0(5)  | O(6A)–N(2A)–O(4A)   | 124.2(18) |
| O(7)#1–La(1)–O(4A)    | 71.4(5)  | O(6A)–N(2A)–O(5A)   | 121.2(15) |
| O(10)–La(1)–O(4A)     | 73.2(4)  | O(4A)–N(2A)–O(5A)   | 114.4(14) |
| O(10)#1–La(1)–O(4A)   | 118.7(3) | C(5)–C(4)–C(3)      | 122.6(8)  |
| O(7)–La(1)–O(4A)#1    | 71.4(5)  | C(4)–C(5)–C(6)      | 120.1(8)  |
| O(7)#1–La(1)–O(4A)#1  | 71.0(5)  | O(7)–P(1)–O(8)      | 119.5(9)  |
| O(10)–La(1)–O(4A)#1   | 118.7(3) | O(7)–P(1)–O(9A)     | 117.4(6)  |
| O(10)#1–La(1)–O(4A)#1 | 73.2(4)  | O(7)–P(1)–O(9)      | 108.3(9)  |
| O(2)–La(1)–O(4A)#1    | 96.5(7)  | O(8)–P(1)–O(9)      | 104.2(13) |
| O(1)–La(1)–O(4A)#1    | 143.9(7) | O(7)–P(1)–O(8A)     | 113.1(6)  |
| O(4)–La(1)–O(4A)#1    | 145.5(7) | O(9A)–P(1)–O(8A)    | 102.6(7)  |
| O(4)#1–La(1)–O(4A)#1  | 13.1(5)  | O(7)–P(1)–C(1)      | 109.0(3)  |
| O(7)–La(1)–O(5)       | 122.8(3) | O(8)–P(1)–C(1)      | 106.8(12) |
| O(7)#1–La(1)–O(5)     | 70.3(4)  | O(9A)–P(1)–C(1)     | 112.9(6)  |
| O(10)–La(1)–O(5)      | 111.1(4) | O(9)–P(1)–C(1)      | 108.5(11) |
| O(10)#1–La(1)–O(5)    | 65.1(4)  | O(8A)–P(1)–C(1)     | 100.5(7)  |
| O(2)–La(1)–O(5)       | 98.4(5)  | C(16)–O(8)–P(1)     | 118.9(16) |
| O(1)–La(1)–O(5)       | 56.6(5)  | C(17)–C(16)–O(8)    | 115(2)    |
| O(4)–La(1)–O(5)       | 48.9(3)  | C(18)–O(9)–P(1)     | 127.8(17) |
| O(4)#1–La(1)–O(5)     | 134.7(4) | O(9)–C(18)–C(19)    | 103.9(19) |
| O(7)–La(1)–O(5)#1     | 70.3(4)  | C(16A)–O(8A)–P(1)   | 124.6(12) |
| O(7)#1–La(1)–O(5)#1   | 122.8(3) | C(17A)–C(16A)–O(8A) | 114.3(13) |
| O(10)–La(1)–O(5)#1    | 65.1(4)  | C(18A)–O(9A)–P(1)   | 122.9(10) |
| O(10)#1–La(1)–O(5)#1  | 111.1(4) | C(19A)–C(18A)–O(9A) | 108.6(13) |
| O(2)–La(1)–O(5)#1     | 67.4(5)  | C(7)–C(6)–C(5)      | 120.2(8)  |
| O(1)–La(1)–O(5)#1     | 109.8(5) | P(1)–O(7)–La(1)     | 149.1(3)  |
| O(4)–La(1)–O(5)#1     | 134.7(4) | C(6)–C(7)–C(8)      | 121.3(8)  |
| O(4)#1–La(1)–O(5)#1   | 48.9(3)  | O(10)–P(2)–O(11A)   | 115.8(13) |

|                      |           |                   |          |
|----------------------|-----------|-------------------|----------|
| O(10)–P(2)–O(12)     | 114.6(8)  | C(9)–C(8)–C(3)    | 118.1(7) |
| O(10)–P(2)–O(12A)    | 116.2(16) | C(9)–C(8)–C(7)    | 123.4(7) |
| O(11A)–P(2)–O(12A)   | 102.0(16) | C(3)–C(8)–C(7)    | 118.5(7) |
| O(10)–P(2)–O(11)     | 113.1(6)  | C(10)–C(9)–C(8)   | 123.3(7) |
| O(12)–P(2)–O(11)     | 103.6(8)  | C(10)–C(9)–Br(1)  | 118.9(6) |
| O(10)–P(2)–C(1)      | 111.7(3)  | C(8)–C(9)–Br(1)   | 117.8(5) |
| O(11A)–P(2)–C(1)     | 108.8(17) | P(2)–O(10)–La(1)  | 143.6(3) |
| O(12)–P(2)–C(1)      | 105.8(5)  | C(9)–C(10)–C(15)  | 118.3(6) |
| O(12A)–P(2)–C(1)     | 100.9(12) | C(9)–C(10)–C(11)  | 122.9(7) |
| O(11)–P(2)–C(1)      | 107.4(8)  | C(15)–C(10)–C(11) | 118.9(7) |
| C(20)–O(11)–P(2)     | 121.6(9)  | C(12)–C(11)–C(10) | 122.9(8) |
| O(11)–C(20)–C(21)    | 107.9(10) | C(11)–C(12)–C(13) | 119.4(8) |
| C(22)–O(12)–P(2)     | 116.3(10) | C(14)–C(13)–C(12) | 120.9(9) |
| C(23)–C(22)–O(12)    | 109.8(17) | C(13)–C(14)–C(15) | 124.7(8) |
| C(20A)–O(11A)–P(2)   | 121(2)    | C(2)–C(15)–C(10)  | 120.6(6) |
| O(11A)–C(20A)–C(21A) | 107(2)    | C(2)–C(15)–C(14)  | 126.3(6) |
| C(22A)–O(12A)–P(2)   | 127(3)    | C(10)–C(15)–C(14) | 113.1(6) |
| C(23A)–C(22A)–O(12A) | 113(3)    |                   |          |

### 3 ATR IR SPECTRA OF COMPLEXES 5 & 6

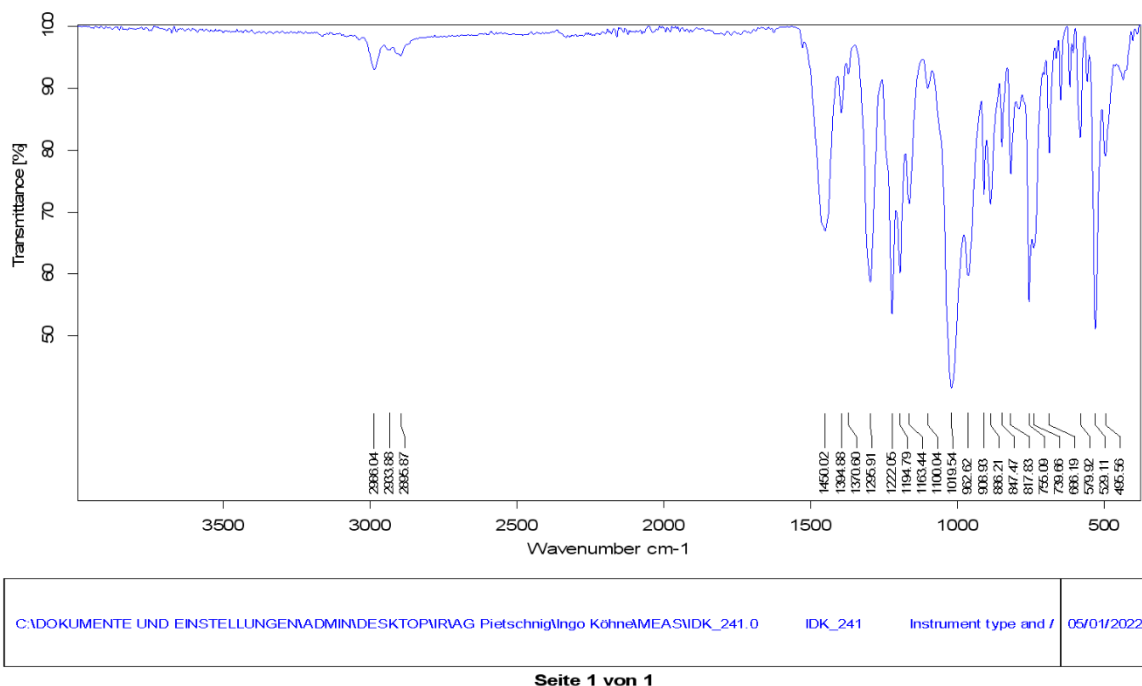

Figure S5. ATR IR-spectrum of complex  $[Nd(L3)_2(NO_3)_3]$  (5).

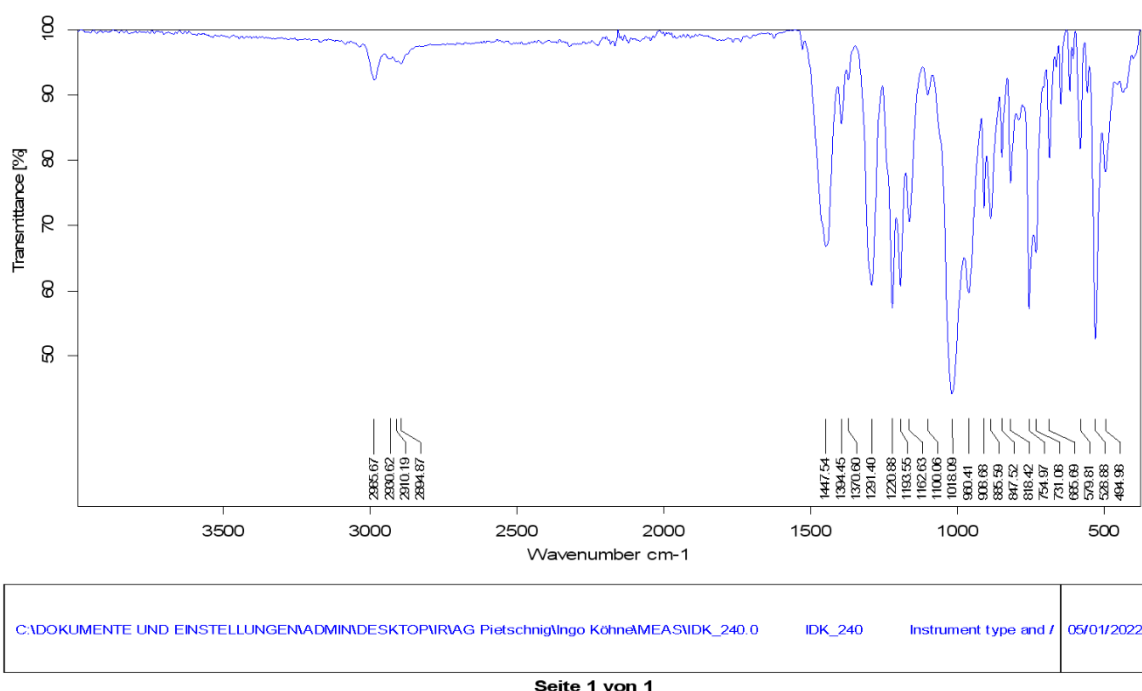

Figure S6. ATR IR-spectrum of complex  $[La(L3)_2(NO_3)_3]$  (6).

## 4 ABSORPTION SPECTRUM OF COMPLEX 5

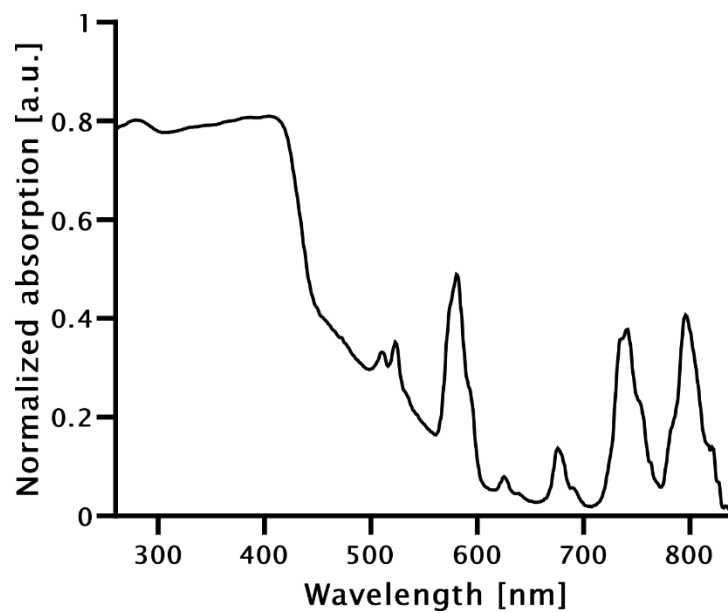

**Figure S7.** Normalized absorption spectrum of complex  $[Nd(L3)_2(NO_3)_3]$  (**5**) at room temperature showing sharp  $Nd^{3+}$  absorption bands.

## 5 REFERENCES

1. Parsons, S.; Flack, H. D.; Wagner, T., Use of intensity quotients and differences in absolute structure refinement. *Acta Crystallogr. B* **2013**, 69 (3), 249-259.
